# Supplementary material for: Translational Regulation of Specific mRNAs Controls Feedback Inhibition and Survival during Macrophage Activation
Source: PubMed Central journal article supplement (PMC4063670; doi:10.1371/journal.pgen.1004368), 2014-06-19
Supplement: pgen.1004368.s008.pdf [file pgen.1004368.s008.pdf]

**Table S1.** Translationally up-regulated mRNAs in 1 h LPS-stimulated RAW264.7 macrophages.

| Symbol               | Name                                                                                | Change of translation (d) | mRNA group* |
|----------------------|-------------------------------------------------------------------------------------|---------------------------|-------------|
| <i>Nfkbid</i>        | nuclear factor of kappa light polypeptide gene enhancer in B cells inhibitor, delta | 1.62                      | 3           |
| <i>Nfkbiz</i>        | nuclear factor of kappa light polypeptide gene enhancer in B cells inhibitor, zeta  | 1.56                      | 1           |
| <i>Nr4a1</i>         | nuclear receptor subfamily 4, group A, member 1                                     | 1.52                      | 3           |
| <i>Ugt1a6a</i>       | UDP glucuronosyltransferase 1 family, polypeptide A6A                               | 1.16                      | 0           |
| <i>Ier3</i>          | immediate early response 3                                                          | 0.97                      | 3           |
| <i>Zfp36</i>         | zinc finger protein 36                                                              | 0.83                      | 3           |
| <i>5031414D18Rik</i> | RIKEN cDNA 5031414D18 gene                                                          | 0.8                       | 2           |
| <i>Impa2</i>         | inositol (myo)-1(or 4)-monophosphatase 2                                            | 0.79                      | 0           |
| <i>Pank1</i>         | pantothenate kinase 1                                                               | 0.79                      | 2           |
| <i>Tnf</i>           | tumor necrosis factor                                                               | 0.76                      | 3           |
| <i>Arhgef39</i>      | Rho guanine nucleotide exchange factor (GEF) 39                                     | 0.73                      | 2           |
| <i>Cxcl2</i>         | chemokine (C-X-C motif) ligand 2                                                    | 0.73                      | 1           |
| <i>Snx30</i>         | sorting nexin family member 30                                                      | 0.73                      | 2           |
| <i>Arl10</i>         | ADP-ribosylation factor-like 10                                                     | 0.72                      | 2           |
| <i>Crot</i>          | carnitine O-octanoyltransferase                                                     | 0.68                      | 2           |
| <i>Dusp1</i>         | dual specificity phosphatase 1                                                      | 0.68                      | 3           |
| <i>Il23a</i>         | interleukin 23, alpha subunit p19                                                   | 0.66                      | 1           |
| <i>Cep78</i>         | centrosomal protein 78                                                              | 0.65                      | 2           |
| <i>Plk3</i>          | polo-like kinase 3                                                                  | 0.65                      | 3           |
| <i>Fam105a</i>       | family with sequence similarity 105, member A                                       | 0.64                      | 2           |
| <i>Zc3h12a</i>       | zinc finger CCCH type containing 12A                                                | 0.64                      | 1           |
| <i>Ppargc1b</i>      | peroxisome proliferative activated receptor, gamma, coactivator 1 beta              | 0.63                      | 2           |
| <i>Ccnb1</i>         | cyclin B1                                                                           | 0.62                      | 0           |
| <i>Pif1</i>          | PIF1 5'-to-3' DNA helicase homolog (S. cerevisiae)                                  | 0.61                      | 0           |
| <i>Tk1</i>           | thymidine kinase 1                                                                  | 0.61                      | 2           |
| <i>Wdr67</i>         | WD Repeat-Containing Protein 67                                                     | 0.6                       | 0           |
| <i>Wdyhv1</i>        | WDYHV motif containing 1                                                            | 0.6                       | 0           |
| <i>Abcd2</i>         | ATP-binding cassette, sub-family D (ALD), member 2                                  | 0.59                      | 2           |
| <i>Fbxo48</i>        | F-box protein 48                                                                    | 0.59                      | 0           |
| <i>Gpr155</i>        | G protein-coupled receptor 155                                                      | 0.59                      | 2           |
| <i>Mastl</i>         | microtubule associated serine/threonine kinase-like                                 | 0.59                      | 2           |
| <i>Usp18</i>         | ubiquitin specific peptidase 18                                                     | 0.59                      | 0           |
| <i>Btbd8</i>         | BTB (POZ) domain containing 8                                                       | 0.58                      | 0           |
| <i>H2-T24</i>        | histocompatibility 2, T region locus 24                                             | 0.57                      | 0           |
| <i>Zfand2a</i>       | zinc finger, AN1-type domain 2A                                                     | 0.57                      | 1           |
| <i>BC028528</i>      | cDNA sequence BC028528                                                              | 0.56                      | 0           |
| <i>Ttc5</i>          | tetratricopeptide repeat domain 5                                                   | 0.56                      | 0           |
| <i>Zfp36l2</i>       | zinc finger protein 36, C3H type-like 2                                             | 0.56                      | 2           |
| <i>Chek2</i>         | checkpoint kinase 2                                                                 | 0.55                      | 2           |
| <i>Mybl1</i>         | myeloblastosis oncogene-like 1                                                      | 0.55                      | 0           |
| <i>Hoxb6</i>         | homeobox B6                                                                         | 0.53                      | 2           |
| <i>Klhl30</i>        | kelch-like 30                                                                       | 0.53                      | 2           |
| <i>Map3k8</i>        | mitogen-activated protein kinase kinase kinase 8                                    | 0.53                      | 3           |
| <i>Chd1l</i>         | chromodomain helicase DNA binding protein 1-like                                    | 0.52                      | 0           |
| <i>Tbc1d2b</i>       | TBC1 domain family, member 2B                                                       | 0.52                      | 2           |
| <i>Fosb</i>          | FBJ osteosarcoma oncogene B                                                         | 0.51                      | 3           |

|                 |                                                                                         |      |   |
|-----------------|-----------------------------------------------------------------------------------------|------|---|
| <i>Gem</i>      | GTP binding protein (gene overexpressed in skeletal muscle)                             | 0.51 | 3 |
| <i>Tnfsf9</i>   | tumor necrosis factor (ligand) superfamily, member 9                                    | 0.51 | 1 |
| <i>Uevld</i>    | UEV and lactate/malate dehydrogenase domains                                            | 0.51 | 0 |
| <i>Acadm</i>    | acyl-Coenzyme A dehydrogenase, medium chain                                             | 0.5  | 0 |
| <i>Nusap1</i>   | nucleolar and spindle associated protein 1                                              | 0.5  | 0 |
| <i>Slc25a40</i> | solute carrier family 25, member 40                                                     | 0.5  | 0 |
| <i>Tada2a</i>   | transcriptional adaptor 2A                                                              | 0.49 | 2 |
| <i>Casp7</i>    | caspase 7                                                                               | 0.48 | 0 |
| <i>Clec4a3</i>  | C-type lectin domain family 4, member a3                                                | 0.48 | 0 |
| <i>Dusp2</i>    | dual specificity phosphatase 2                                                          | 0.48 | 3 |
| <i>Iffo1</i>    | intermediate filament family orphan 1                                                   | 0.48 | 2 |
| <i>Il15ra</i>   | interleukin 15 receptor, alpha chain                                                    | 0.48 | 2 |
| <i>Mtss1</i>    | metastasis suppressor 1                                                                 | 0.48 | 0 |
| <i>Rheb1l</i>   | Ras homolog enriched in brain like 1                                                    | 0.48 | 2 |
| <i>Hps3</i>     | Hermansky-Pudlak syndrome 3 homolog (human)                                             | 0.47 | 0 |
| <i>Prc1</i>     | protein regulator of cytokinesis 1                                                      | 0.47 | 0 |
| <i>Marveld1</i> | MARVEL (membrane-associating) domain containing 1                                       | 0.46 | 2 |
| <i>Acad12</i>   | acyl-Coenzyme A dehydrogenase family, member 12                                         | 0.45 | 0 |
| <i>Fos</i>      | FBJ osteosarcoma oncogene                                                               | 0.45 | 3 |
| <i>Racgap1</i>  | Rac GTPase-activating protein 1                                                         | 0.45 | 0 |
| <i>Sgol2</i>    | shugoshin-like 2 (S. pombe)                                                             | 0.45 | 0 |
| <i>Sgsh</i>     | N-sulfoglucosamine sulfohydrolase (sulfamidase)                                         | 0.45 | 2 |
| <i>Abcd1</i>    | ATP-binding cassette, sub-family D (ALD), member 1                                      | 0.44 | 0 |
| <i>Fgd4</i>     | FYVE, RhoGEF and PH domain containing 4                                                 | 0.44 | 2 |
| <i>Junb</i>     | Jun-B oncogene                                                                          | 0.43 | 3 |
| <i>Ptk2b</i>    | PTK2 protein tyrosine kinase 2 beta                                                     | 0.42 | 0 |
| <i>Rasa3</i>    | RAS p21 protein activator 3                                                             | 0.42 | 2 |
| <i>Sipa1</i>    | signal-induced proliferation associated gene 1                                          | 0.42 | 2 |
| <i>Slco2b1</i>  | solute carrier organic anion transporter family, member 2b1                             | 0.42 | 0 |
| <i>Bora</i>     | bora, aurora kinase A activator                                                         | 0.41 | 0 |
| <i>Inpp5d</i>   | inositol polyphosphate-5-phosphatase D                                                  | 0.41 | 0 |
| <i>Ttk</i>      | Ttk protein kinase                                                                      | 0.41 | 0 |
| <i>Alox5</i>    | arachidonate 5-lipoxygenase                                                             | 0.4  | 0 |
| <i>Aurkb</i>    | aurora kinase B                                                                         | 0.39 | 0 |
| <i>Fbxo9</i>    | f-box protein 9                                                                         | 0.39 | 0 |
| <i>Kbtbd11</i>  | kelch repeat and BTB (POZ) domain containing 11                                         | 0.39 | 2 |
| <i>Kif20a</i>   | kinesin family member 20A                                                               | 0.39 | 0 |
| <i>Pus10</i>    | pseudouridylate synthase 10                                                             | 0.39 | 0 |
| <i>Rgs14</i>    | regulator of G-protein signaling 14                                                     | 0.39 | 2 |
| <i>Traf3ip3</i> | TRAF3 interacting protein 3                                                             | 0.39 | 2 |
| <i>Troap</i>    | trophinin associated protein                                                            | 0.39 | 1 |
| <i>Accs</i>     | 1-aminocyclopropane-1-carboxylate synthase (non-functional)                             | 0.36 | 2 |
| <i>Cep55</i>    | centrosomal protein 55                                                                  | 0.36 | 0 |
| <i>Appl2</i>    | adaptor protein, phosphotyrosine interaction, PH domain and leucine zipper containing 2 | 0.35 | 0 |

\* Group 0, all mRNAs with no significant change in expression levels during 2h stimulation of RAW264.7 macrophages with LPS; Group 1, mRNAs with a significant maximum at or after 1h; Group 2, mRNAs with a significant minimum at or after 1h; Group 3, mRNAs with a significant maximum before 1h; Group 4, mRNAs with a significant minimum before 1h.
