# Supplementary material for: Translational Regulation of Specific mRNAs Controls Feedback Inhibition and Survival during Macrophage Activation
Source: PubMed Central journal article supplement (PMC4063670; doi:10.1371/journal.pgen.1004368), 2014-06-19
Supplement: pgen.1004368.s009.pdf [file pgen.1004368.s009.pdf]

**Table S2.** Translationally down-regulated mRNAs in 1 h LPS-stimulated RAW264.7 macrophages.

| Symbol           | Name                                                                                          | Change of translation (d) | mRNA group* |
|------------------|-----------------------------------------------------------------------------------------------|---------------------------|-------------|
| <i>Cpd</i>       | carboxypeptidase D                                                                            | -1.21                     | 1           |
| <i>Agpat4</i>    | 1-acylglycerol-3-phosphate O-acyltransferase 4 (lysophosphatidic acid acyltransferase, delta) | -1.02                     | 1           |
| <i>Dhx40</i>     | DEAH (Asp-Glu-Ala-His) box polypeptide 40                                                     | -1.02                     | 0           |
| <i>Emr1</i>      | EGF-like module containing, mucin-like, hormone receptor-like sequence 1                      | -0.98                     | 0           |
| <i>Kcnd1</i>     | potassium voltage-gated channel, Shal-related family, member 1                                | -0.98                     | 1           |
| <i>Lif</i>       | leukemia inhibitory factor                                                                    | -0.9                      | 1           |
| <i>C3ar1</i>     | complement component 3a receptor 1                                                            | -0.89                     | 1           |
| <i>Anxa5</i>     | annexin A5                                                                                    | -0.88                     | 0           |
| <i>C3</i>        | complement component 3                                                                        | -0.87                     | 1           |
| <i>Asb2</i>      | ankyrin repeat and SOCS box-containing 2                                                      | -0.86                     | 0           |
| <i>Plin2</i>     | perilipin 2                                                                                   | -0.86                     | 0           |
| <i>Sra1</i>      | steroid receptor RNA activator 1                                                              | -0.85                     | 0           |
| <i>Pdlim5</i>    | PDZ and LIM domain 5                                                                          | -0.84                     | 1           |
| <i>Nfkb1</i>     | nuclear factor of kappa light polypeptide gene enhancer in B cells 1, p105                    | -0.83                     | 1           |
| <i>Swap70</i>    | SWA-70 protein                                                                                | -0.81                     | 1           |
| <i>Ptpn23</i>    | protein tyrosine phosphatase, non-receptor type 23                                            | -0.8                      | 1           |
| <i>Lcat</i>      | lecithin cholesterol acyltransferase                                                          | -0.78                     | 1           |
| <i>Hist2h3c2</i> | histone cluster 2, H3c2                                                                       | -0.75                     | 0           |
| <i>Aoc2</i>      | amine oxidase, copper containing 2 (retina-specific)                                          | -0.74                     | 1           |
| <i>Gm614</i>     | predicted gene 614                                                                            | -0.72                     | 3           |
| <i>Csf3</i>      | colony stimulating factor 3 (granulocyte)                                                     | -0.71                     | 1           |
| <i>Abcg4</i>     | ATP-binding cassette, sub-family G (WHITE), member 4                                          | -0.7                      | 1           |
| <i>Pdlim7</i>    | PDZ and LIM domain 7                                                                          | -0.7                      | 1           |
| <i>Pilrb1</i>    | paired immunoglobulin-like type 2 receptor beta 1                                             | -0.7                      | 0           |
| <i>Sqstm1</i>    | sequestosome 1                                                                                | -0.7                      | 1           |
| <i>Creb5</i>     | cAMP responsive element binding protein 5                                                     | -0.69                     | 1           |
| <i>Atg2a</i>     | autophagy related 2A                                                                          | -0.68                     | 0           |
| <i>Tlr9</i>      | toll-like receptor 9                                                                          | -0.68                     | 0           |
| <i>Stap1</i>     | signal transducing adaptor family member 1                                                    | -0.67                     | 1           |
| <i>Tnfaip2</i>   | tumor necrosis factor, alpha-induced protein 2                                                | -0.67                     | 1           |
| <i>Wdr1</i>      | WD repeat domain 1                                                                            | -0.67                     | 1           |
| <i>Nfkb2</i>     | nuclear factor of kappa light polypeptide gene enhancer in B cells 2, p49/p100                | -0.65                     | 1           |
| <i>Ehd1</i>      | EH-domain containing 1                                                                        | -0.64                     | 1           |
| <i>Icosl</i>     | icos ligand                                                                                   | -0.64                     | 1           |
| <i>Rab11fip1</i> | RAB11 family interacting protein 1 (class I)                                                  | -0.64                     | 1           |
| <i>Rhbdd1</i>    | rhomboid domain containing 1                                                                  | -0.64                     | 1           |
| <i>H2-K1</i>     | histocompatibility 2, K1, K region                                                            | -0.63                     | 0           |
| <i>Irg1</i>      | immunoresponsive gene 1                                                                       | -0.63                     | 1           |
| <i>Mpeg1</i>     | macrophage expressed gene 1                                                                   | -0.63                     | 0           |
| <i>Ap3b1</i>     | adaptor-related protein complex 3, beta 1 subunit                                             | -0.62                     | 0           |
| <i>Ubox5</i>     | U box domain containing 5                                                                     | -0.62                     | 0           |
| <i>Dusp4</i>     | dual specificity phosphatase 4                                                                | -0.61                     | 1           |
| <i>Slfn2</i>     | schlafen 2                                                                                    | -0.61                     | 1           |
| <i>Tnfrsf1b</i>  | tumor necrosis factor receptor superfamily, member 1b                                         | -0.61                     | 1           |
| <i>Plek</i>      | pleckstrin                                                                                    | -0.6                      | 1           |
| <i>Cdk18</i>     | cyclin-dependent kinase 18                                                                    | -0.59                     | 1           |

Schott et al.

|                   |                                                                                     |       |   |
|-------------------|-------------------------------------------------------------------------------------|-------|---|
| <i>Gpatch2l</i>   | G patch domain containing 2 like                                                    | -0.59 | 0 |
| <i>Slc31a2</i>    | solute carrier family 31, member 2                                                  | -0.59 | 1 |
| <i>Ap2b1</i>      | adaptor-related protein complex 2, beta 1 subunit                                   | -0.58 | 0 |
| <i>Glul</i>       | glutamate-ammonia ligase (glutamine synthetase)                                     | -0.58 | 0 |
| <i>Gm11127</i>    | predicted gene 11127                                                                | -0.58 | 0 |
| <i>Osbpl8</i>     | oxysterol binding protein-like 8                                                    | -0.58 | 1 |
| <i>Gm15080</i>    | predicted gene 15080                                                                | -0.57 | 0 |
| <i>Pus3</i>       | pseudouridine synthase 3                                                            | -0.57 | 1 |
| <i>Slc11a2</i>    | solute carrier family 11 (proton-coupled divalent metal ion transporters), member 2 | -0.57 | 1 |
| <i>Bcl6b</i>      | B cell CLL/lymphoma 6, member B                                                     | -0.56 | 1 |
| <i>Gm7609</i>     | predicted pseudogene 7609                                                           | -0.56 | 0 |
| <i>Pik3r5</i>     | phosphoinositide-3-kinase, regulatory subunit 5, p101                               | -0.56 | 1 |
| <i>Apbb3</i>      | amyloid beta (A4) precursor protein-binding, family B, member 3                     | -0.55 | 1 |
| <i>Arl5c</i>      | ADP-ribosylation factor-like 5C                                                     | -0.55 | 1 |
| <i>Cd40</i>       | CD40 antigen                                                                        | -0.55 | 1 |
| <i>Dcpp1</i>      | demilune cell and parotid protein 1                                                 | -0.55 | 0 |
| <i>Gigyf2</i>     | GRB10 interacting GYF protein 2                                                     | -0.55 | 1 |
| <i>Tm9sf4</i>     | transmembrane 9 superfamily protein member 4                                        | -0.55 | 1 |
| <i>Ets2</i>       | E26 avian leukemia oncogene 2, 3' domain                                            | -0.54 | 1 |
| <i>Itga5</i>      | integrin alpha 5 (fibronectin receptor alpha)                                       | -0.54 | 1 |
| <i>Kif4</i>       | kinesin family member 4                                                             | -0.54 | 0 |
| <i>Por</i>        | P450 (cytochrome) oxidoreductase                                                    | -0.54 | 1 |
| <i>Spag9</i>      | sperm associated antigen 9                                                          | -0.54 | 1 |
| <i>Trim13</i>     | tripartite motif-containing 13                                                      | -0.54 | 1 |
| <i>Cd69</i>       | CD69 antigen                                                                        | -0.53 | 1 |
| <i>Fam71f2</i>    | family with sequence similarity 71, member F2                                       | -0.53 | 2 |
| <i>Gadd45a</i>    | growth arrest and DNA-damage-inducible 45 alpha                                     | -0.53 | 1 |
| <i>Rasip1</i>     | Ras interacting protein 1                                                           | -0.53 | 1 |
| <i>Ythdc2</i>     | YTH domain containing 2                                                             | -0.53 | 0 |
| <i>2310014L17</i> | RIKEN cDNA 2310014L17 gene                                                          | -0.52 | 3 |
| <i>Rik</i>        |                                                                                     |       |   |
| <i>Cybb</i>       | cytochrome b-245, beta polypeptide                                                  | -0.52 | 1 |
| <i>Ddah2</i>      | dimethylarginine dimethylaminohydrolase 2                                           | -0.52 | 1 |
| <i>Eftud1</i>     | elongation factor Tu GTP binding domain containing 1                                | -0.52 | 0 |
| <i>Erb2ip</i>     | Erb2 interacting protein                                                            | -0.52 | 1 |
| <i>Il1b</i>       | interleukin 1 beta                                                                  | -0.52 | 1 |
| <i>Kcnj2</i>      | potassium inwardly-rectifying channel, subfamily J, member 2                        | -0.52 | 4 |
| <i>Lpcat2</i>     | lysophosphatidylcholine acyltransferase 2                                           | -0.52 | 0 |
| <i>Niacr1</i>     | niacin receptor 1                                                                   | -0.52 | 1 |
| <i>Nos2</i>       | nitric oxide synthase 2, inducible                                                  | -0.52 | 1 |
| <i>Star</i>       | steroidogenic acute regulatory protein                                              | -0.52 | 3 |
| <i>Traf1</i>      | TNF receptor-associated factor 1                                                    | -0.52 | 1 |
| <i>Cdo1</i>       | cysteine dioxygenase 1, cytosolic                                                   | -0.51 | 1 |
| <i>Eya3</i>       | eyes absent 3 homolog (Drosophila)                                                  | -0.51 | 0 |
| <i>Tank</i>       | TRAF family member-associated Nf-kappa B activator                                  | -0.51 | 1 |
| <i>Dcstamp</i>    | dentocyte expressed seven transmembrane protein                                     | -0.5  | 1 |
| <i>Hivep3</i>     | human immunodeficiency virus type I enhancer binding protein 3                      | -0.5  | 1 |
| <i>Necab3</i>     | N-terminal EF-hand calcium binding protein 3                                        | -0.5  | 0 |
| <i>Uba6</i>       | ubiquitin-like modifier activating enzyme 6                                         | -0.5  | 1 |
| <i>Hgsnat</i>     | heparan-alpha-glucosaminide N-acetyltransferase                                     | -0.49 | 0 |

|                                 |                                                                           |       |   |
|---------------------------------|---------------------------------------------------------------------------|-------|---|
| <i>Kctd12</i>                   | potassium channel tetramerisation domain containing 12                    | -0.49 | 1 |
| <i>Pla2g4c</i>                  | phospholipase A2, group IVC (cytosolic, calcium-independent)              | -0.49 | 1 |
| <i>Atp1a1</i>                   | ATPase, Na <sup>+</sup> /K <sup>+</sup> transporting, alpha 1 polypeptide | -0.48 | 0 |
| <i>Fam129b</i>                  | family with sequence similarity 129, member B                             | -0.48 | 0 |
| <i>H2-Q4</i>                    | histocompatibility 2, Q region locus 4                                    | -0.48 | 1 |
| <i>Sod2</i>                     | superoxide dismutase 2, mitochondrial                                     | -0.48 | 1 |
| <i>Sfr1</i>                     | SWI5 dependent recombination repair 1                                     | -0.47 | 0 |
| <i>Gm4636</i>                   | predicted gene 4636                                                       | -0.46 | 0 |
| <i>Gripap1</i>                  | GRIP1 associated protein 1                                                | -0.46 | 1 |
| <i>Il2rg</i>                    | interleukin 2 receptor, gamma chain                                       | -0.46 | 0 |
| <i>Rhoc</i>                     | ras homolog gene family, member C                                         | -0.45 | 1 |
| <i>Sort1</i>                    | sortilin 1                                                                | -0.45 | 0 |
| <i>Itpkb</i>                    | inositol 1,4,5-trisphosphate 3-kinase B                                   | -0.44 | 1 |
| <i>Ngly1</i>                    | N-glycanase 1                                                             | -0.44 | 0 |
| <i>Sfn9</i>                     | schlafen 9                                                                | -0.44 | 0 |
| <i>Tgfb1i1</i>                  | transforming growth factor beta 1 induced transcript 1                    | -0.44 | 0 |
| <i>Xrn2</i>                     | 5'-3' exoribonuclease 2                                                   | -0.44 | 0 |
| <i>Abcb1b</i>                   | ATP-binding cassette, sub-family B (MDR/TAP), member 1B                   | -0.43 | 0 |
| <i>Pold2</i>                    | polymerase (DNA directed), delta 2, regulatory subunit                    | -0.43 | 0 |
| <i>Mtmr7</i>                    | myotubularin related protein 7                                            | -0.42 | 1 |
| <i>Zswim1</i>                   | zinc finger SWIM-type containing 1                                        | -0.42 | 0 |
| <i>1810026J23</i><br><i>Rik</i> | RIKEN cDNA 1810026J23 gene                                                | -0.41 | 0 |
| <i>B3galt4</i>                  | UDP-Gal:betaGlcNAc beta 1,3-galactosyltransferase, polypeptide 4          | -0.41 | 0 |
| <i>Ccdc15</i>                   | coiled-coil domain containing 15                                          | -0.41 | 1 |
| <i>Sdcbp</i>                    | syndecan binding protein                                                  | -0.41 | 0 |
| <i>Taf1</i>                     | TAF1 RNA polymerase II, TATA box binding protein (TBP)-associated factor  | -0.41 | 0 |
| <i>Ugt1a5</i>                   | UDP glucuronosyltransferase 1 family, polypeptide A5                      | -0.41 | 0 |
| <i>Smox</i>                     | spermine oxidase                                                          | -0.39 | 1 |
| <i>Ccdc25</i>                   | coiled-coil domain containing 25                                          | -0.38 | 0 |
| <i>Mknk2</i>                    | MAP kinase-interacting serine/threonine kinase 2                          | -0.38 | 0 |
| <i>Olf1162</i>                  | olfactory receptor 1162                                                   | -0.38 | 0 |
| <i>Dcbld2</i>                   | discoidin, CUB and LCCL domain containing 2                               | -0.37 | 1 |
| <i>Cnr2</i>                     | cannabinoid receptor 2 (macrophage)                                       | -0.36 | 2 |
| <i>Tnip3</i>                    | TNFAIP3 interacting protein 3                                             | -0.36 | 1 |

\* Group 0, all mRNAs with no significant change in expression levels during 2h stimulation of RAW264.7 macrophages with LPS; Group 1, mRNAs with a significant maximum at or after 1h; Group 2, mRNAs with a significant minimum at or after 1h; Group 3, mRNAs with a significant maximum before 1h; Group 4, mRNAs with a significant minimum before 1h.
