# Supplementary material for: Translational Regulation of Specific mRNAs Controls Feedback Inhibition and Survival during Macrophage Activation
Source: PubMed Central journal article supplement (PMC4063670; doi:10.1371/journal.pgen.1004368), 2014-06-19
Supplement: pgen.1004368.s010.pdf [file pgen.1004368.s010.pdf]

**Table S3.** Cytokines and their expression features in 1 h LPS-stimulated RAW264.7 macrophages.

| Symbol        | Name                                                 | Change of translation (d) | mRNA group* |
|---------------|------------------------------------------------------|---------------------------|-------------|
| <i>Ccl1</i>   | chemokine (C-C motif) ligand 1                       | -0.12                     | 0           |
| <i>Ccl11</i>  | chemokine (C-C motif) ligand 11                      | -0.04                     | 0           |
| <i>Ccl12</i>  | chemokine (C-C motif) ligand 12                      | n.d.                      | n.d.        |
| <i>Ccl17</i>  | chemokine (C-C motif) ligand 17                      | -0.2                      | 0           |
| <i>Ccl19</i>  | chemokine (C-C motif) ligand 19                      | -0.23                     | 0           |
| <i>Ccl2</i>   | chemokine (C-C motif) ligand 2                       | -0.43                     | 1           |
| <i>Ccl20</i>  | chemokine (C-C motif) ligand 20                      | 0                         | 1           |
| <i>Ccl22</i>  | chemokine (C-C motif) ligand 22                      | -0.19                     | 1           |
| <i>Ccl24</i>  | chemokine (C-C motif) ligand 24                      | -0.22                     | 0           |
| <i>Ccl25</i>  | chemokine (C-C motif) ligand 25                      | 0.09                      | 0           |
| <i>Ccl26</i>  | chemokine (C-C motif) ligand 26                      | n.d.                      | n.d.        |
| <i>Ccl27a</i> | chemokine (C-C motif) ligand 27A                     | -0.11                     | 0           |
| <i>Ccl28</i>  | chemokine (C-C motif) ligand 28                      | n.d.                      | n.d.        |
| <i>Ccl3</i>   | chemokine (C-C motif) ligand 3                       | 0.32                      | 1           |
| <i>Ccl4</i>   | chemokine (C-C motif) ligand 4                       | 0.63                      | 1           |
| <i>Ccl5</i>   | chemokine (C-C motif) ligand 5                       | -0.34                     | 1           |
| <i>Ccl6</i>   | chemokine (C-C motif) ligand 6                       | -0.04                     | 0           |
| <i>Ccl7</i>   | chemokine (C-C motif) ligand 7                       | -0.14                     | 1           |
| <i>Ccl8</i>   | chemokine (C-C motif) ligand 8                       | n.d.                      | n.d.        |
| <i>Ccl9</i>   | chemokine (C-C motif) ligand 9                       | 0.01                      | 1           |
| <i>Cd40lg</i> | CD40 ligand                                          | n.d.                      | n.d.        |
| <i>Cd70</i>   | CD70 antigen                                         | n.d.                      | n.d.        |
| <i>Csf1</i>   | colony stimulating factor 1 (macrophage)             | -0.57                     | 1           |
| <i>Csf2</i>   | colony stimulating factor 2 (granulocyte-macrophage) | -0.19                     | 1           |
| <i>Csf3</i>   | colony stimulating factor 3 (granulocyte)            | -0.71                     | 1           |
| <i>Cxcl1</i>  | chemokine (C-X-C motif) ligand 1                     | 0.07                      | 1           |
| <i>Cxcl10</i> | chemokine (C-X-C motif) ligand 10                    | 0.12                      | 1           |
| <i>Cxcl11</i> | chemokine (C-X-C motif) ligand 11                    | -0.02                     | 1           |
| <i>Cxcl12</i> | chemokine (C-X-C motif) ligand 12                    | 0.02                      | 0           |
| <i>Cxcl13</i> | chemokine (C-X-C motif) ligand 13                    | n.d.                      | n.d.        |
| <i>Cxcl14</i> | chemokine (C-X-C motif) ligand 14                    | 0.27                      | 0           |
| <i>Cxcl15</i> | chemokine (C-X-C motif) ligand 15                    | n.d.                      | n.d.        |
| <i>Cxcl16</i> | chemokine (C-X-C motif) ligand 16                    | n.d.                      | n.d.        |
| <i>Cxcl17</i> | chemokine (C-X-C motif) ligand 17                    | -0.09                     | 0           |
| <i>Cxcl2</i>  | chemokine (C-X-C motif) ligand 2                     | 0.73                      | 1           |
| <i>Cxcl3</i>  | chemokine (C-X-C motif) ligand 3                     | 0.08                      | 1           |
| <i>Cxcl5</i>  | chemokine (C-X-C motif) ligand 5                     | n.d.                      | n.d.        |
| <i>Cxcl9</i>  | chemokine (C-X-C motif) ligand 9                     | n.d.                      | n.d.        |
| <i>Fasl</i>   | Fas ligand (TNF superfamily, member 6)               | n.d.                      | n.d.        |
| <i>Ifna1</i>  | interferon alpha 1                                   | 0.25                      | 0           |
| <i>Ifna11</i> | interferon alpha 11                                  | n.d.                      | n.d.        |
| <i>Ifna12</i> | interferon alpha 12                                  | n.d.                      | n.d.        |
| <i>Ifna13</i> | interferon alpha 13                                  | n.d.                      | n.d.        |
| <i>Ifna14</i> | interferon, alpha 14                                 | -0.17                     | 0           |
| <i>Ifna2</i>  | interferon alpha 2                                   | -0.14                     | 0           |
| <i>Ifna4</i>  | interferon alpha 4                                   | n.d.                      | n.d.        |

|                     |                                          |              |          |
|---------------------|------------------------------------------|--------------|----------|
| <i>lfna5</i>        | interferon alpha 5                       | -0.15        | 0        |
| <i>lfna6</i>        | interferon alpha 6                       | n.d.         | n.d.     |
| <i>lfna7</i>        | interferon alpha 7                       | n.d.         | n.d.     |
| <i>lfna9</i>        | interferon alpha 9                       | 0.03         | 0        |
| <i>lfnab</i>        | interferon alpha B                       | 0.23         | 0        |
| <i>lfnb1</i>        | interferon beta 1, fibroblast            | n.d.         | n.d.     |
| <i>lfne</i>         | interferon epsilon                       | -0.16        | 0        |
| <i>lfng</i>         | interferon gamma                         | -0.07        | 0        |
| <i>lfnk</i>         | interferon kappa                         | n.d.         | n.d.     |
| <i>lfnl2</i>        | interferon lambda 2                      | -0.27        | 0        |
| <i>lfnl3</i>        | interferon lambda 3                      | -0.13        | 0        |
| <i>ll10</i>         | interleukin 10                           | n.d.         | n.d.     |
| <i>ll11</i>         | interleukin 11                           | -0.2         | 0        |
| <i>ll12a</i>        | interleukin 12a                          | -0.02        | 0        |
| <i>ll12b</i>        | interleukin 12b                          | 0.09         | 0        |
| <i>ll13</i>         | interleukin 13                           | 0.07         | 0        |
| <i>ll15</i>         | interleukin 15                           | n.d.         | n.d.     |
| <i>ll16</i>         | interleukin 16                           | 0.2          | 0        |
| <i>ll17a</i>        | interleukin 17A                          | 0.08         | 0        |
| <i>ll17b</i>        | interleukin 17B                          | 0.02         | 0        |
| <i>ll17c</i>        | interleukin 17C                          | 0.01         | 0        |
| <i>ll17d</i>        | interleukin 17D                          | 0.04         | 0        |
| <i>ll17f</i>        | interleukin 17F                          | -0.18        | 0        |
| <i>ll18</i>         | interleukin 18                           | -0.21        | 0        |
| <i>ll19</i>         | interleukin 19                           | n.d.         | n.d.     |
| <i>ll1a</i>         | interleukin 1 alpha                      | n.d.         | n.d.     |
| <b><i>ll1b</i></b>  | <b>interleukin 1 beta</b>                | <b>-0.52</b> | <b>1</b> |
| <i>ll1f10</i>       | interleukin 1 family, member 10          | n.d.         | n.d.     |
| <i>ll1f5</i>        | interleukin 1 family, member 5 (delta)   | -0.14        | 0        |
| <i>ll1f6</i>        | interleukin 1 family, member 6           | n.d.         | n.d.     |
| <i>ll1f8</i>        | interleukin 1 family, member 8           | n.d.         | n.d.     |
| <i>ll1f9</i>        | interleukin 1 family, member 9           | n.d.         | n.d.     |
| <i>ll2</i>          | interleukin 2                            | n.d.         | n.d.     |
| <i>ll20</i>         | interleukin 20                           | n.d.         | n.d.     |
| <i>ll21</i>         | interleukin 21                           | n.d.         | n.d.     |
| <b><i>ll23a</i></b> | <b>interleukin 23, alpha subunit p19</b> | <b>0.66</b>  | <b>1</b> |
| <i>ll24</i>         | interleukin 24                           | n.d.         | n.d.     |
| <i>ll25</i>         | interleukin 25                           | 0.05         | 0        |
| <i>ll27</i>         | interleukin 27                           | -0.12        | 1        |
| <i>ll3</i>          | interleukin 3                            | n.d.         | n.d.     |
| <i>ll31</i>         | interleukin 31                           | -0.06        | 0        |
| <i>ll33</i>         | interleukin 33                           | n.d.         | n.d.     |
| <i>ll34</i>         | interleukin 34                           | -0.2         | 0        |
| <i>ll4</i>          | interleukin 4                            | n.d.         | n.d.     |
| <i>ll5</i>          | interleukin 5                            | n.d.         | n.d.     |
| <i>ll6</i>          | interleukin 6                            | n.d.         | n.d.     |
| <i>ll7</i>          | interleukin 7                            | n.d.         | n.d.     |
| <i>ll9</i>          | interleukin 9                            | -0.08        | 0        |
| <b><i>Lif</i></b>   | <b>leukemia inhibitory factor</b>        | <b>-0.9</b>  | <b>1</b> |

|                      |                                                             |             |          |
|----------------------|-------------------------------------------------------------|-------------|----------|
| <i>Lta</i>           | lymphotoxin A                                               | -0.14       | 1        |
| <i>Ltb</i>           | lymphotoxin B                                               | 0.04        | 0        |
| <i>Mif</i>           | macrophage migration inhibitory factor                      | 0.2         | 0        |
| <i>Osm</i>           | oncostatin M                                                | 0.31        | 1        |
| <i>Tgfb1</i>         | transforming growth factor, beta 1                          | -0.1        | 1        |
| <i>Tgfb2</i>         | transforming growth factor, beta 2                          | n.d.        | n.d.     |
| <i>Tgfb3</i>         | transforming growth factor, beta 3                          | n.d.        | n.d.     |
| <b><i>Tnf</i></b>    | <b>tumor necrosis factor</b>                                | <b>0.76</b> | <b>3</b> |
| <i>Tnfsf10</i>       | tumor necrosis factor (ligand) superfamily, member 10       | n.d.        | n.d.     |
| <i>Tnfsf11</i>       | tumor necrosis factor (ligand) superfamily, member 11       | -0.1        | 0        |
| <i>Tnfsf12</i>       | tumor necrosis factor (ligand) superfamily, member 12       | n.d.        | n.d.     |
| <i>Tnfsf13</i>       | tumor necrosis factor (ligand) superfamily, member 13       | n.d.        | n.d.     |
| <i>Tnfsf13b</i>      | tumor necrosis factor (ligand) superfamily, member 13b      | 0.26        | 0        |
| <i>Tnfsf14</i>       | tumor necrosis factor (ligand) superfamily, member 14       | -0.02       | 0        |
| <i>Tnfsf15</i>       | tumor necrosis factor (ligand) superfamily, member 15       | -0.28       | 0        |
| <i>Tnfsf18</i>       | tumor necrosis factor (ligand) superfamily, member 18       | n.d.        | n.d.     |
| <i>Tnfsf4</i>        | tumor necrosis factor (ligand) superfamily, member 4        | n.d.        | n.d.     |
| <i>Tnfsf8</i>        | tumor necrosis factor (ligand) superfamily, member 8        | n.d.        | n.d.     |
| <b><i>Tnfsf9</i></b> | <b>tumor necrosis factor (ligand) superfamily, member 9</b> | <b>0.51</b> | <b>1</b> |

\* Group 0, all mRNAs with no significant change in expression levels during 2h stimulation of RAW264.7 macrophages with LPS; Group 1, mRNAs with a significant maximum at or after 1h; Group 2, mRNAs with a significant minimum at or after 1h; Group 3, mRNAs with a significant maximum before 1h; Group 4, mRNAs with a significant minimum before 1h.

Translationally up-regulated mRNAs are shaded in orange, translationally down-regulated mRNAs in blue.
