# Supplementary material for: Translational Regulation of Specific mRNAs Controls Feedback Inhibition and Survival during Macrophage Activation
Source: PubMed Central journal article supplement (PMC4063670; doi:10.1371/journal.pgen.1004368), 2014-06-19
Supplement: pgen.1004368.s011.pdf [file pgen.1004368.s011.pdf]

**Table S4 Feedback inhibitors and their expression features in 1 h LPS-stimulated RAW264.7 macrophages**

| Symbol  | Name                                                                                  | Change of translation (d) | mRNA group* | PMID     |
|---------|---------------------------------------------------------------------------------------|---------------------------|-------------|----------|
| Atf3    | activating transcription factor 3                                                     | -0.27                     | 3           | 19478204 |
| Cd180   | CD180 antigen                                                                         | -0.08                     | 0           | 19478204 |
| Cdkn1a  | cyclin-dependent kinase inhibitor 1A (P21)                                            | 0.47                      | 1           | 19478204 |
| Celf1   | CUGBP, Elav-like family member 1                                                      | -0.16                     | 1           | 21956941 |
| Cited2  | Cbp/p300-interacting transactivator, with Glu/Asp-rich carboxy-terminal domain, 2     | 0.1                       | 1           | 21098220 |
| Commd1  | COMM domain containing 1                                                              | 0.48                      | 0           | 19233657 |
| Cul2    | cullin 2                                                                              | -0.25                     | 0           | 21772279 |
| Cyld    | cyldromatosis (turban tumor syndrome)                                                 | 0.24                      | 0           | 19233657 |
| Dusp1   | dual specificity phosphatase 1                                                        | 0.68                      | 3           | 22330073 |
| Exosc9  | exosome component 9                                                                   | -0.15                     | 0           | 21956941 |
| Fbxw7   | F-box and WD-40 domain protein 7                                                      | 0.04                      | 0           | 23575666 |
| Hnrnpd  | heterogeneous nuclear ribonucleoprotein D                                             | -0.14                     | 1           | 21956941 |
| Ier3    | immediate early response 3                                                            | 0.97                      | 3           | 19233657 |
| Il1rl1  | interleukin 1 receptor-like 1                                                         | 0.08                      | 0           | 19233657 |
| Irak3   | interleukin-1 receptor-associated kinase 3                                            | -0.3                      | 1           | 19233657 |
| Itch    | itchy, E3 ubiquitin protein ligase                                                    | -0.04                     | 0           | 19233657 |
| Khsrp   | KH-type splicing regulatory protein                                                   | -0.49                     | 0           | 21956941 |
| Nfkbia  | nuclear factor of kappa light polypeptide gene enhancer in B cells inhibitor, alpha   | -0.21                     | 3           | 19233657 |
| Nfkbib  | nuclear factor of kappa light polypeptide gene enhancer in B cells inhibitor, beta    | -0.19                     | 1           | 19233657 |
| Nfkbid  | nuclear factor of kappa light polypeptide gene enhancer in B cells inhibitor, delta   | 1.62                      | 3           | 19233657 |
| Nfkbie  | nuclear factor of kappa light polypeptide gene enhancer in B cells inhibitor, epsilon | 0                         | 1           | 21772279 |
| Nfkbiz  | nuclear factor of kappa light polypeptide gene enhancer in B cells inhibitor, zeta    | 1.56                      | 1           | 19233657 |
| Nr4a1   | nuclear receptor subfamily 4, group A, member 1                                       | 1.52                      | 3           | 19325155 |
| Otud7b  | OTU domain containing 7B                                                              | -0.22                     | 0           | 19233657 |
| Pdlim2  | PDZ and LIM domain 2                                                                  | 0.06                      | 2           | 19233657 |
| Pdpk1   | 3-phosphoinositide dependent protein kinase 1                                         | -0.09                     | 0           | 20584979 |
| Pecam1  | platelet/endothelial cell adhesion molecule 1                                         | n,d,                      | n,d,        | 18025177 |
| Pias1   | protein inhibitor of activated STAT 1                                                 | -0.06                     | 0           | 21772279 |
| Pias4   | protein inhibitor of activated STAT 4                                                 | -0.03                     | 0           | 21772279 |
| Ppp1ca  | protein phosphatase 1, catalytic subunit, alpha isoform                               | 0.26                      | 0           | 19233657 |
| Rc3h1   | RING CCCH (C3H) domains 1                                                             | 0.33                      | 1           | 23663784 |
| Rc3h2   | ring finger and CCCH-type zinc finger domains 2                                       | 0                         | 1           | 23663784 |
| Sarm1   | sterile alpha and HEAT/Armadillo motif containing 1                                   | -0.16                     | 0           | 21772279 |
| Setd7   | SET domain containing (lysine methyltransferase) 7                                    | 0                         | 0           | 21772279 |
| Sigirr  | single immunoglobulin and toll-interleukin 1 receptor (TIR) domain                    | 0.13                      | 0           | 19233657 |
| Slc39a8 | solute carrier family 39 (metal ion transporter), member 8                            | 0.12                      | 0           | 23403290 |
| Socs1   | suppressor of cytokine signaling 1                                                    | -0.07                     | 1           | 19233657 |
| Socs3   | suppressor of cytokine signaling 3                                                    | 0.03                      | 1           | 19233657 |
| Tax1bp1 | Tax1 (human T cell leukemia virus type I) binding protein 1                           | -0.09                     | 0           | 19233657 |
| Tnfaip3 | tumor necrosis factor, alpha-induced protein 3                                        | -0.13                     | 3           | 19233657 |
| Tnip1   | TNFAIP3 interacting protein 1                                                         | -0.41                     | 1           | 19233657 |
| Tnip2   | TNFAIP3 interacting protein 2                                                         | 0.11                      | 0           | 21772279 |
| Tnip3   | TNFAIP3 interacting protein 3                                                         | -0.36                     | 1           | 19233657 |
| Trib3   | tribbles homolog 3 (Drosophila)                                                       | -0.25                     | 1           | 19233657 |
| Trim30a | tripartite motif-containing 30A                                                       | 0.22                      | 0           | 19233657 |

|         |                                                     |       |      |          |
|---------|-----------------------------------------------------|-------|------|----------|
| Trim38  | tripartite motif-containing 38                      | n,d,  | n,d, | 22323536 |
| Twist1  | twist basic helix-loop-helix transcription factor 1 | 0.12  | 0    | 19233657 |
| Twist2  | twist basic helix-loop-helix transcription factor 2 | 0     | 0    | 19233657 |
| Zc3h12a | zinc finger CCCH type containing 12A                | 0.64  | 1    | 21956941 |
| Zc3h12d | zinc finger CCCH type containing 12D                | -0.13 | 0    | 22036805 |
| Zfp36   | zinc finger protein 36                              | 0.83  | 3    | 21956941 |
| Zfp36l1 | zinc finger protein 36, C3H type-like 1             | 0.46  | 3    | 21956941 |
| Zfp36l2 | zinc finger protein 36, C3H type-like 2             | 0.56  | 2    | 21956941 |

\* Group 0, all mRNAs with no significant change in expression levels during 2h stimulation of RAW264.7 macrophages with LPS; Group 1, mRNAs with a significant maximum at or after 1h; Group 2, mRNAs with a significant minimum at or after 1h; Group 3, mRNAs with a significant maximum before 1h; Group 4, mRNAs with a significant minimum before 1h.
